# Supplementary material
Source: PubMed Central journal article supplement (PMC5469251)
Supplement: hpeds.2016-0090SupplementaryData.pdf [file hpeds.2016-0090SupplementaryData.pdf]

## Supplemental Information

### WARM Respiratory Scoring Tool

|                                                                                                               |       |
|---------------------------------------------------------------------------------------------------------------|-------|
| <b>Wheeze</b>                                                                                                 |       |
| None                                                                                                          | 0     |
| End Expiratory                                                                                                | 1     |
| Entire Expiratory / Any Inspiratory                                                                           | 2     |
| <b>Air Exchange</b> <i>Assess the following 4 chest areas: left front, right front, left back, right back</i> |       |
| Normal                                                                                                        | 0     |
| One Area Decreased                                                                                            | 1     |
| More Than One Area Decreased                                                                                  | 2     |
| <b>Respiratory Rate</b> <i>Tachypnea threshold: 0–6 months, &gt; 60; 6–18 months, &gt; 50</i>                 |       |
| Normal Below Threshold                                                                                        | 0     |
| Above Tachypnea Threshold                                                                                     | 1     |
| <b>Muscle Use (Retractions)</b>                                                                               |       |
| None                                                                                                          | 0     |
| Subcostal / Intercostal                                                                                       | 1     |
| Any Neck or Abdominal                                                                                         | 2     |
| <b>TOTAL</b>                                                                                                  | _____ |

**SUPPLEMENTAL FIGURE 3** WARM scoring rubric used in the BQIP collaborative.
